# Supplementary material
Source: PubMed Central journal article supplement (PMC6487911)
Supplement: jamaoncol-5-872-s001.pdf [file jamaoncol-5-872-s001.pdf]

1 A randomized trial evaluating rapid delivery of dose escalated Stereotactic Body  
2 Radiotherapy for patients diagnosed with bone metastases for effective palliation of  
3 symptoms.

4  
5  
6 1. OBJECTIVES:

- 7 a. Primary objective: evaluate hypo-fractionated regimen for pain control in terms  
8 of time to failure, defined as the first occurrence of any of the following events:  
9 i. Worsening in pain score by at least 2 categories by MDASI survey,  
10 ii.  $\geq 50\%$  increase in dose of opioid/narcotic medication,  
11 iii. Re-irradiation,  
12 iv. Radiographic disease progression or development of pathologic fracture  
13 from disease progression  
14 b. Secondary objective: report outcomes  
15 i. Prospectively report pain, quality of life, and symptoms using MDASI  
16 assessment tool to measure pain response  
17 ii. Evaluate narcotics use after treatment  
18 iii. Report acute (skin, fatigue, flare reaction) and long term (sclerosis, bone  
19 ossification, bone fracture rate) toxicity associated with treatment.  
20 iv. Report local control, disease-free survival, overall survival  
21 v. Report rate of re-irradiation and salvage surgery  
22

23 2. BACKGROUND:

- 24 a. Radiation therapy is commonly utilized to effectively palliate symptomatic bone  
25 metastases, 50%-80% of patients experience improvement in the pain and 20%-  
26 50% report complete pain relief (1, 2). However, the optimal fractionation  
27 scheme to produce durable pain relief is still being studied. Historically, clinical  
28 trials have compared efficacy of varying dose-fractionation in alleviating  
29 symptoms. Ratanatharathorn et al. concluded in their analysis that higher dose  
30 fractionated treatments produced better pain outcomes compared to lower-  
31 dose regimens (3, Ratanatharathorn). Contrary to this, McQuay et al. in their  
32 summary determined no difference in efficacy between different fractionation or  
33 dose response in the total dose delivered for painful bone metastases (4,  
34 McQuay). In the meta-analysis performed by Wu et al (5, Wu) the authors  
35 compared pain relief among various dose-fractionation schedules of localized  
36 radiotherapy (RT) in the treatment of painful bone metastases. They concluded  
37 among the randomized trials, there was no significant difference in overall pain  
38 relief or dose response relationship between single and multi-fraction palliative  
39 RT for bone metastases.  
40

41 In the last two decades, multiple randomized trials have compared the  
42 efficacy of various dose-fractionation in achieving durable pain relief in patients  
43 diagnosed with bone metastases. A randomized trial, RTOG 9714 investigated  
44 whether 8 Gy delivered in a single fraction provided pain and narcotic relief

45 equivalent to the standard 30 Gy in 10 fractions. The study demonstrated both  
46 regimens were equivalent in terms of pain and narcotic relief, and well tolerated  
47 with few adverse effects. The shorter 8 Gy arm had a higher re-treatment rate  
48 but with less acute toxicity than the longer 30 Gy arm (6, Hartsell). However, the  
49 Trans-Tasman Radiation Oncology Group (TROG 96.05) was a randomized trial  
50 which demonstrated 8 Gy in a single fraction was not as effective as 20 Gy in 5  
51 fractions; the overall response rate and time to treatment failure were inferior  
52 (7, Roos). The re-treatment rate has been reported to be higher in patients  
53 treated by single fraction radiotherapy; this could be due to the decrease in  
54 durability of pain response related to the lower dose equivalent (8, Sze).

55  
56 A single delivery of higher dose of radiation treatment can be advantageous in  
57 regards to patient convenience and cost effectiveness as long as it can provide  
58 durable pain control. The optimal single fraction dose required to achieve pain  
59 control is still unknown and not determined from current clinical trials. Gaze et  
60 al demonstrated an overall pain response rate of 84% and complete pain  
61 response rate of 34% with delivery of a single fraction of 10 Gy (9, Gaze) for  
62 patients with osseous metastases. Higher doses of 12 Gy and 15 Gy have  
63 demonstrated a dose response of increased overall pain response of 86% and  
64 complete pain response in 57% of patients (10, Kagei). Radiosurgery doses of  
65  $\geq 16$  Gy has been shown to increase the probability of pain relief for patients with  
66 spine metastases by multiple institutions such as Henry Ford and University of  
67 Pittsburgh (11, 12, Ryu, Gerzten). Researchers at M.D. Anderson have  
68 demonstrated the use of single fraction SBRT with doses of 16-24 Gy for spinal  
69 metastases was safe and allowed patients to achieve durable local control (88%  
70 at 18 months) with few toxicities (13, Garg).

71  
72 Multiple prospective randomized trials have investigated the efficacy of shorter  
73 versus longer fractionated radiation therapy courses for the treatment of painful  
74 bone metastases with conflicting results. Few studies prospectively address the  
75 relief of neuropathic pain, re-irradiation rates, fracture rates and prospective  
76 quality of life endpoints. In this study, we propose to deliver a dose escalated  
77 single fraction (12 Gy or 16 Gy) regimen compared to the standard 30 Gy in 10  
78 fractions to report the safest optimal hypo-fractionated regimen in providing  
79 durable symptomatic relief.

### 80 81 3. SCIENTIFIC RATIONALE:

- 82 a. This study aims to prospectively evaluate the optimal radiation therapy dose to  
83 provide durable pain relief, assess patients' quality of life, narcotics use after  
84 radiation therapy, outcome, and toxicity. The goal of this prospective  
85 randomized trial is to radiate patients with mechanically stable, painful bone  
86 metastases effectively to provide quick palliation of pain. The hypothesis is rapid  
87 delivery of dose escalated hypofractionated radiotherapy for bone metastases  
88 effectively improves pain and results in durable pain control.

89  
90  
91  
92  
93  
94  
95  
96  
97  
98  
99  
100  
101  
102  
103  
104  
105  
106  
107  
108  
109  
110  
111  
112  
113  
114  
115  
116  
117  
118  
119  
120  
121  
122  
123  
124  
125  
126  
127  
128  
129  
130  
131  
132

4. PATIENT ELIGIBILITY

a. INCLUSION:

- i. Patients with a pathologic diagnosis of malignancy
- ii. Patients with any radiographic evidence of bone metastases, including plain x-ray, bone scan, CT scan, MRI, or PET scan
- iii. Patients with pain or dysaesthesia
- iv. Patients with a life expectancy of more than 3 months
- v. Patients able to complete pain assessment and quality of life surveys
- vi. Patients with multiple osseous sites are eligible; however should not treat more than 3 separate radiation treatment fields concurrently.
- vii. Patients with surgery for osseous metastases allowed.

b. EXCLUSION:

- i. Patients with prior radiation therapy to the treatment site
- ii. Patients with a current, untreated spinal cord compression
- iii. Patients with a radiographic or pathologic fracture to the treatment site
- iv. Patients with painful metastases to hands and feet that need to be radiated on protocol
- v. Patients previously treated with radioactive isotope (e.g. Sr89) within 30 days of randomization

5. PRE-TREATMENT EVALUATION:

- a. The workup will include physical examination, radiographic evidence of metastases with either x-ray, bone scan, CT scan or MRI, and pathologic confirmation of malignancy per MDACC standard of care.
- b. All eligible patients will be enrolled after completion of the eligibility checklist.
- c. Use of pain medications (narcotic/opioids/NSAIDs) will be evaluated.

6. TREATMENT PLAN:

- a. Patients will be randomized to receive radiation therapy to:
  - i. Arm 1: the standard hypofractionated regimen of 3 Gy x 10 fractions
  - ii. Arm 2: 12 Gy x 1 fraction or 16 Gy x 1 fractions adaptively depending on the size of the metastases or gross tumor volume (GTV).
- b. Patients will undergo CT simulation and either 2-D or 3-D treatment planning for radiation therapy.
- c. Patients can be treated with 2-D, 3-D, or intensity modulated radiation therapy (IMRT)
- d. Patients will be treated with on board imaging (OBI) using KV, MV x-rays, cone beam CT or CT on rails per standard of care.
- e. Patients will be treated with 4-20 MV photon beam, 5-20 MeV electron beam, or 200 MeV-300 MeV proton beam.
- f. More than 1 osseous site may be included into one radiation treatment field.

7. EVALUATION DURING STUDY:

- 133 a. All patients will be evaluated by the radiation oncologist during radiation  
134 treatment  
135 b. If surgical intervention is necessary, the patients will be evaluated by the treating  
136 surgeon  
137 c. After start of treatment, all patients will be followed by phone calls within 7-14  
138 days, and at + 1 month (+/- 1 week) and then with clinic visits at months 3, 6, 9,  
139 12 (+/- 4 weeks for each visit) and every 3 to 6 month intervals thereafter (until  
140 death) by either the radiation oncology or orthopedic team to evaluate toxicity.  
141 The validated surveys (MDASI) will be completed at baseline prior to radiation  
142 and at each follow up interval/appointments. The patient medical record  
143 number will be placed on the survey before it is given to the patient for  
144 completion. The surveys may be filled out in person or by mail.  
145 d. Patients will report their symptom measures with validated quality of life  
146 instrument MDASI index. The M.D. Anderson Symptom Inventory (MDASI) is a  
147 multi-symptom patient reported outcome measure evaluating 13 core symptom  
148 items interfering with patients' daily life (Appendix B).  
149 e. We will also prospectively report the narcotics/NSAIDs utilization and outcome  
150 at each follow-up interval after radiation therapy.

151  
152  
153 8. EVALUATION OF TOXICITY:

- 154 a. During radiotherapy, the patient will be examined weekly and acute reactions  
155 recorded.  
156 b. Toxicity occurring after 3 months of radiation therapy; these will be evaluated  
157 and documented using NCI CTCAE version 4.03 (Appendix A).  
158

159 9. CRITERIA FOR RESPONSE:

- 160 a. The response to treatment will be determined by both radiographic scans and  
161 symptoms reported.  
162 b. Complete pain relief is defined as average pain score of 0 for two consecutive  
163 analysis periods.  
164 c. The time to maximal relief of pain is defined from the first day of irradiation until  
165 the lowest pain score after radiation therapy.  
166 d. Treatment failure is defined as worsening of pain by at least two categories,  
167 >50% increase in dose of opioid/narcotic medications, re-irradiation for pain or  
168 disease progression, progression or development of pathologic fracture from  
169 disease progression.  
170 e. Any patient with progressive pain in the radiated area will have work up which  
171 include radiographic scans to evaluate for bone stability and pathologic fracture  
172 per standard of care.  
173

174 10. RE-TREATMENT:

- 175 a. Response and pain relief from radiation therapy may take several weeks;  
176 therefore patients should not be re-irradiated for at least 4 weeks after

177 completion of radiation. Dose and fractionation are left to the discretion of the  
178 treating radiation oncologist.  
179 b. Surgical intervention for treatment failures, bone instability, or fractures will be  
180 reported.

181  
182  
183 11. STATISTICAL CONSIDERATIONS:

184 This is a phase II/III non-inferiority trial following the design suggestions of Korn et al.  
185 (14, Korn). The primary outcome for this study is treatment failure at 3 months, where  
186 treatment failure is as defined in section 1.0. We assume that time to treatment failure  
187 follows an exponential distribution for each treatment arm (standard radiation,  
188 hypofractionated radiation). We also assume that the standard radiation arm will have  
189 25% of patients with treatment failure at 3 months, based on the study by the Bone Pain  
190 Trial Working Party (15, BPTWP). A hazard ratio of 1.5 implies that the hypofractionated  
191 radiation arm will have 35% of patients with treatment failure at 3 months. We expect  
192 to enroll 10 patients per month.

193  
194 *Randomization*

195  
196 Patients will be randomized to standard or hypofractionated radiation therapy using  
197 CORE. Randomization will be stratified by tumor size ( $\leq 4$  cm vs.  $> 4$  cm), site of bony  
198 mets (extremities, pelvis, abdomen, head/neck, chest), and 1 vs  $>1$  site irradiated. We  
199 expect approximately 40% of patients will have bony mets in the extremities and  
200 approximately 35% will have bony mets in the pelvis. We expect the distribution of  
201 patients enrolling will approximately be 40% lung malignancy, 25% genitourinary  
202 malignancy, 15% breast malignancy, 10% multiple myeloma and 10% other malignancy.  
203 We will have a total of 14 stratification levels.

204  
205 *Phase II*

206  
207 We will test the following hypothesis:

208  
209 
$$H_0: \rho = 1.5 \quad \text{vs.} \quad H_1: \rho = 1.0,$$

210  
211 where  $\rho$  is the hazard ratio (hypofractionated/standard) for time to treatment failure, as  
212 defined in section 1.0. A sample size of 150 patients (75 randomized to each treatment  
213 arm) will yield 90% power with a 1-sided significance level of 0.20 to reject the null  
214 hypothesis ( $H_0$ ) and conclude that hypofractionated treatment is not inferior to  
215 standard treatment in terms of time to treatment failure. We use a 1-sided significance  
216 level of 0.20 as recommended by Rubinstein et al. (16, Rubinstein) for phase II screening  
217 trials. This sample size will yield 110 events (i.e., treatment failures). It will take 15  
218 months to enroll all the patients, and the maximum study duration is expected to be 22  
219 months to observe the 110 events. The final analysis for phase II will be performed once

220 we've observed 110 events, and we will suspend accrual while we wait for these events  
221 to occur. We will continue to phase III only if we reject  $H_0$  at the 0.20 significance level.  
222

223 *Phase III*

224  
225 We will test the following hypothesis:

$$226 \quad H_0: \rho = 1.5 \quad \text{vs.} \quad H_1: \rho = 1.0,$$

227  
228  
229 where  $\rho$  is the hazard ratio (hypofractionated/standard) for time to treatment failure, as  
230 defined in section 1.0. We will need to observe 208 events to have 90% power to reject  
231  $H_0$  and conclude that the hypofractionated treatment is not inferior to standard  
232 treatment in terms of time to treatment failure with a 1-sided significance level of 0.05.  
233 The patients enrolled in the phase II part of the study will be included in the phase III  
234 part of the study. If we enroll 10 patients per month we expect to have to enroll 300  
235 patients in total (150 randomized to each treatment arm) to observe these 208 events,  
236 requiring 30 months, or 15 months of additional accrual if we reject  $H_0$  in the phase II  
237 part of the trial. We also expect to have to follow patients an additional 1 month after  
238 the last patient is enrolled before we observe the 208<sup>th</sup> event. Thus, our trial duration is  
239 expected to be  $22 + 15 + 1 = 38$  months. If we haven't observed 208 events by month 38  
240 we will conduct the final analysis once we've followed the last patient for 3 months. Our  
241 overall power is  $90\% \times 90\% = 81\%$ , and our type I error rate in the phase III part of the  
242 study is 5%.

243  
244 This sample size calculation was performed using East 5.4 (Copyright © 2010, Cytel Inc.,  
245 Cambridge, MA).

246 *Toxicity Monitoring*

247  
248 We will monitor the rate of radiation induced toxicity (skin dermatitis grade  $\geq 4$ ,  
249 gastrointestinal (GI) grade  $\geq 3$ , genitourinary (GU) grade  $\geq 3$ ) by 12 months after the  
250 start of radiation therapy for the hypofractionated radiation therapy arm. We will enroll  
251 at least 25 patients and at most 150 patients on this treatment arm, and we will use the  
252 methods of Thall et al. (17, Thall et al.) to monitor the radiation induced toxicity rate.  
253 We will stop enrolling patients on the hypofractionated radiation therapy arm if we  
254 have reason to believe that the rate of radiation induced toxicity for this arm is more  
255 than 10%.

256  
257 Formally, we will stop enrolling patients on the hypofractionated radiation therapy arm  
258 if  $\Pr(\text{radiation induced toxicity rate} < 10\% \mid \text{data}) < 0.10$ . That is, if there is less than a  
259 10% chance that the rate of radiation induced toxicity is less than 10%, then we will stop  
260 enrolling patients on the hypofractionated radiation therapy arm.

261  
262 We will actually monitor the time to radiation induced toxicity, because these toxicities  
263 may occur at any time from the start of radiation therapy. We will use the Clinical Trial

264 Conduct website (<https://biostatistics.mdanderson.org/ClinicalTrialConduct>) to monitor  
 265 the toxicity stopping rule. This website is built and maintained by the Department of  
 266 Biostatistics. The research staff will be trained by the study statistician in the use of the  
 267 website to monitor the stopping rules, with an emphasis on the importance of updating  
 268 toxicity outcomes and follow-up dates.

269  
 270 To obtain the operating characteristics for the stopping rule we simulated the trial 1000  
 271 times for various scenarios described in the table below. We assumed that patients are  
 272 enrolled at the rate of 5 per month on the hypofractionated radiation therapy arm, that  
 273 we would follow patients for 12 months, and that we will evaluate the stopping rule  
 274 continually. The table below summarizes the operating characteristics of this stopping  
 275 rule.

| Operating Characteristics for the Toxicity Monitoring Rule |                   |                 |      |                 |                                   |
|------------------------------------------------------------|-------------------|-----------------|------|-----------------|-----------------------------------|
| 12-Month<br>Toxicity Rate                                  | Pr(Stop<br>Early) | Sample Size     |      |                 | Avg Trial<br>Duration<br>(Months) |
|                                                            |                   | P <sub>25</sub> | Mean | P <sub>75</sub> |                                   |
| 0.05                                                       | < 0.001           | 150             | 150  | 150             | 42.1                              |
| 0.10                                                       | 0.087             | 150             | 148  | 150             | 40.9                              |
| 0.15                                                       | 0.871             | 101             | 122  | 150             | 28.5                              |
| 0.20                                                       | 0.999             | 72              | 90   | 105             | 18.2                              |

282  
 283 At any point in the trial time to radiation induced toxicity can be calculated for each  
 284 patient, with the time interval regarded as censored at the date of last follow-up if  
 285 toxicity has not been observed for a patient. We will apply a Bayesian method for  
 286 updating prior information with time to toxicity data observed to that time. We assume  
 287 that the time to toxicity for each patient is exponentially distributed with a median of  $\lambda_S$   
 288 months for the standard treatment and a median of  $\lambda_E$  for the experimental treatment.  
 289 Given the historical data we assume  $\lambda_S$  follows an inverse gamma distribution with mean  
 290 78.95 months and a standard deviation of 0.15 months. The middle 95% of this  
 291 distribution is between 78.66 and 79.24 months. These parameters correspond to a 12-  
 292 month toxicity rate between 9.064% and 10.035%. We assume  $\lambda_E$  follows an inverse  
 293 gamma distribution with a mean of 78.95 months and a standard deviation of 15.0  
 294 months. The middle 95% of this distribution is between 54.87 and 113.32 months.  
 295 These parameters correspond to a 12-month toxicity rate between 7.077% and  
 296 14.066%.

297

298 Since the goal of the study is to achieve a toxicity rate of less than 10% at 12 months,  
299 the trial will be stopped early if, based on the available data,  
300  $\Pr(\lambda_E < \lambda_S \mid \text{data from the trial}) < 0.10$ . This rule was chosen to achieve an  
301 approximately 0.10 early stopping probability if the true toxicity rate is 10%.

302  
303 *Final Analysis*

304  
305 We will use descriptive statistics to summarize the demographic and clinical  
306 characteristics of patients by treatment arm.

307  
308 We will use the methods of Gooley et al. (18, Gooley) to estimate the cumulative  
309 incidence of treatment failure for each treatment arm with death as a competing event,  
310 and we will estimate the percent of patients without treatment failure at 3, 6, and 12  
311 months for each treatment arm with a 95% confidence interval.

312  
313 We will use the methods of Fine and Gray (19, Fine and Gray) to model time to  
314 treatment failure with death as a competing event and test the hypotheses stated  
315 above for phase II and for phase III. We will also estimate the hazard ratio for treatment  
316 with a 95% confidence interval.

317  
318 We will use descriptive statistics and boxplots to summarize the score from the MDASI  
319 instrument at each assessment time. We will similarly summarize changes in scores for  
320 these instruments over time. We will use mixed effects regression methods with  
321 repeated measures and patient as a random effect to model instrument scores over  
322 time to test for treatment differences.

323  
324 We will use the product limit estimator of Kaplan and Meier (20, Kaplan and Meier) to  
325 estimate overall survival and disease-free survival stratified by treatment arm. We will  
326 use Cox proportional hazards regression to model OS and DFS as a function of treatment  
327 arm, and we will estimate the hazard ratio for treatment with a 95% confidence interval  
328 (21, Cox).

329  
330 We will use descriptive statistics to summarize narcotics use and acute and long-term  
331 adverse events for each treatment arm.

332  
333 We will use Fisher's exact test to compare treatment arms with respect to the rates of  
334 re-irradiation and salvage surgery.

335  
336 12. Database

337  
338 Study data will be collected and managed using REDCap (Research Electronic Data Capture)  
339 electronic data capture tools hosted at MD Anderson. [ref 22] REDCap ([www.project-  
340 redcap.org](http://www.project-redcap.org)) is a secure, web-based application with controlled access designed to support data  
341 capture for research studies, providing: 1) an intuitive interface for validated data entry; 2)



342 audit trails for tracking data manipulation and export procedures; 3) automated export  
343 procedures for seamless downloads to common statistical packages; and 4) procedures for  
344 importing data from external sources. REDCap (<https://redcap.mdanderson.org>) is hosted on a  
345 secure server by MD Anderson Cancer Center's Department of Research Information Systems &  
346 Technology Services. REDCap has undergone a Governance Risk & Compliance Assessment  
347 (05/14/14) by MD Anderson's Information Security Office and found to be compliant with  
348 HIPAA, Texas Administrative Codes 202-203, University of Texas Policy 165, federal regulations  
349 outlined in 21CFR Part 11, and UTMDACC Institutional Policy #ADM0335.

350  
351

### 352 13REFERENCES:

- 353
- 354 1. Bates T. A review of local radiotherapy in the treatment of bone metastases  
355 and cord compression. *Int J Radiat Oncol Biol Phys* 1992; 23:217-221
  - 356 2. Maher EJ. The use of palliative radiotherapy in the management of breast  
357 cancer. *Eur J Cancer* 1992; 28:706-710.
  - 358 3. Ratanatharathorn, Powers, Moss et al. Bone metastases: review and critical  
359 analysis of random allocation trials of local field treatment. *Int. J. Radiat*  
360 *Oncol Biol Phys.* 1994; 44:1-18.
  - 361 4. McQuay, Collins, Carroll et al. Radiotherapy for the palliation of painful bone  
362 metastases. In: *The Cochrane Library.* 2002, Issue 1. Oxford: Update  
363 Software.
  - 364 5. Wu, Wong, and Johnston et al. Meta-analysis of dose-fractionation  
365 radiotherapy trials for the palliation of painful bone metastases. *Int. J. Radiat*  
366 *Onc. Bio. Phys.* 2003; Vol 55(3), pp.594-605, 2003.
  - 367 6. Hartsell, Scott, Bruner, et al. Randomized trial of short versus long-course  
368 radiotherapy for palliation of painful bone metastases. *JNCI.* 2005; 97(11):  
369 798-804.
  - 370 7. Roos, Turner, O'Brien, et al. Randomized trial of 8 Gy in 1 versus 20 Gy in 5  
371 fractions of radiotherapy for neuropathic pain due to bone metastases (TROG  
372 96.05). *Radiotherapy and Oncology.* 2005; 75: 54-63.
  - 373 8. Sze WM, Shelley MD, Wilt TJ, Mason MD. Palliation of Metastatic Bone Pain:  
374 Single fraction vs Multifraction Radiotherapy-A systematic Review of  
375 Randomized trials. *Clinical Oncology.* 2003; 15: 345-352.
  - 376 9. Gaze MN, Kelly CG, Kerr GY, et al. Pain relief and quality of life following  
377 radiotherapy for bone metastases: a randomized trial of two fractionation  
378 schedules. *Radiother Oncol.* 1997; 45: 109-16.
  - 379 10. Kagei K, Suzuki K, Shirato H, et al. A randomized trial of single and  
380 multifraction radiation therapy for bone metastasis: a preliminary report.  
381 *Japan J Cancer Clin.* 1990;36: 2553-8.
  - 382 11. Ryu S, Jin R, Jin JJ, et al. Pain Control by Image-guided Radiosurgery for  
383 Solitary Spinal Metastases. *J Pain Symp Manage.* 2008; 35: 292-298.
  - 384 12. Gerzten PC, Burton SA, Ozhasoglu C, et al. Radisurgery for the treatment of  
385 renal cell carcinoma. *J Neurosurg Spine.* 2005; 3(4): 288-295.

- 386  
387  
388  
389  
390  
391  
392  
393  
394  
395  
396  
397  
398  
399  
400  
401  
402  
403  
404  
405  
406  
407  
408  
409  
410  
411  
412  
413  
414  
415  
416  
417  
418  
419
13. Garg AK, Shiu AS, Yang J. Phase I/II Trial of Single-session Stereotactic Body Radiotherapy for Previously Unirradiated Spinal Metastases. *Cancer*. 2012 Oct 15;118(20):5069-77
  14. Korn EL, Freidlin B, Abrams JS, Halabi S. Design issues in randomized phase II/III trials. *J Clin Oncol*. 2012 Feb 20;30(6):667-71.
  15. Bone Pain Trial Working Party. 8 Gy single fraction radiotherapy for the treatment of metastatic skeletal pain: randomized comparison with a multifraction schedule over 12 months of patient follow-up. *Radiotherapy and Oncology*. 1999;52:111-121.
  16. Rubinstein LV, Korn EL, Freidlin B, Hunsberger S, Ivy SP, Smith MA. Design issues of randomized phase II trials and a proposal for phase II screening trials. *J Clin Oncol* 2005;23:7199-7206.
  17. Thall PF, Simon RM, Estey EH. Bayesian sequential monitoring designs for single-arm clinical trials with multiple outcomes. *Stat Med*. 1995 Feb 28;14(4):357-79.
  18. Gooley TA, Leisenring W, Crowley J, and Storer BE. Estimation of failure probabilities in the presence of competing risks: new representations of old estimators. *Statistics in Medicine*. 1999; 18:695-706.
  19. Fine JP, Gray RJ. A proportional hazards model for the subdistribution of a competing risk. *Journal of the American Statistical Association* 1999;94:496-509.
  20. Kaplan EL and Meier P. Nonparametric estimation from incomplete observations. *Journal of the American Statistical Association* 1958; 53:457-481.
  21. Cox DR. Regression models and life tables (with discussion). *Journal of the Royal Statistical Society B* 1972; 34:187-220.
  22. Paul A. Harris, Robert Taylor, Robert Thielke, Jonathon Payne, Nathaniel Gonzalez, Jose G. Conde. Research electronic data capture (REDCap) - A metadata-driven methodology and workflow process for providing translational research informatics support. *J Biomed Inform*, 2009. 42(2):377-81.

420  
421

12. TABLE A: PATIENT ASSESSMENT CHECKLIST

| Time                                        | H&P | CBC | X-ray, CT, MRI, bone scan* | Path Dx | MDASI Survey | Phone call follow-up | Toxicity/AE assessment |
|---------------------------------------------|-----|-----|----------------------------|---------|--------------|----------------------|------------------------|
| Pre-RT                                      | X   | X   | X                          | X       | X            |                      | X                      |
| Within 7-10 days post XRT                   |     |     |                            |         | X            | X                    |                        |
| 1 month post XRT <sup>2</sup>               |     |     |                            |         | X            | X                    |                        |
| 3 month f/u <sup>1</sup>                    |     |     | X                          |         | X            |                      | X                      |
| 6 month f/u <sup>1</sup>                    |     |     | X                          |         | X            |                      | X                      |
| 9 month f/u <sup>1</sup>                    |     |     | X                          |         | X            |                      | X                      |
| 12 month f/u <sup>1</sup>                   |     |     | X                          |         | X            |                      | X                      |
| 3-6 month interval thereafter (until death) |     |     | X                          |         | X            |                      | X                      |

422  
423  
424  
425  
426

\*Per standard of care

<sup>1</sup> Within +/- 4 weeks

<sup>2</sup> Within +/- 1 week

| Time                                            | H&P | CBC | X-ray, CT, MRI, bone scan* | Path Dx | MDASI Survey | Narcotic/Opioid/NSAID use | Toxicity/AE assessment |
|-------------------------------------------------|-----|-----|----------------------------|---------|--------------|---------------------------|------------------------|
| Pre-RT                                          | X   | X   | X                          | X       | X            | X                         | X                      |
| Within 7-14 days post start of XRT by phone     |     |     |                            |         | X            | X                         | X                      |
| 1 month post start of XRT by phone <sup>2</sup> |     |     |                            |         | X            | X                         | X                      |
| 3 month f/u <sup>1</sup>                        |     |     | X                          |         | X            | X                         | X                      |

|                                                |  |  |   |  |   |   |   |
|------------------------------------------------|--|--|---|--|---|---|---|
| 6 month<br>f/u <sup>1</sup>                    |  |  | X |  | X | X | X |
| 9 month<br>f/u <sup>1</sup>                    |  |  | X |  | X | X | X |
| 12 month<br>f/u <sup>1</sup>                   |  |  | X |  | X | X | X |
| 3-6 month interval<br>thereafter (until death) |  |  | X |  | X | X | X |

427

428 \*Per standard of care

429 <sup>1</sup> Within +/- 4 weeks

430 <sup>2</sup> Within +/- 1 week

431

432

433 13. APPENDIX A: NCI CTCAE version 4.03

434 14. APPENDIX B: The M.D. Anderson Symptom Inventory (MDASI) survey

435

436

437

438

439
