# Supplementary material
Source: PubMed Central journal article supplement (PMC6487911)
Supplement: jamaoncol-5-872-s002.pdf [file jamaoncol-5-872-s002.pdf]

## Supplementary Online Content

Nguyen Q, Chun SG, Chow E, et al. Single-fraction stereotactic vs conventional multifraction radiotherapy for pain relief in patients with predominantly nonspine bone metastases: a randomized phase 2 trial. Published online April 25, 2019. *JAMA*. doi:10.1001/jamaoncol.2019.0192

**eTable.** Patient Characteristics

**eFigure 1.** Overall survival estimates by treatment group in the intent-to-treat analysis

**eFigure 2.** Proportions of patients with or without severe symptoms on the 13-core-item MD Anderson Symptom Index (MDASI) after irradiation of bone metastases

This supplementary material has been provided by the authors to give readers additional information about their work.

**eTable. Patient Characteristics**

|                         | Value or No. of Patients (%)  |                                 | Total<br>(n=160) |
|-------------------------|-------------------------------|---------------------------------|------------------|
|                         | Multifraction Group<br>(n=79) | Single-Fraction Group<br>(n=81) |                  |
| Age at Diagnosis, years |                               |                                 |                  |
| Mean $\pm$ SD           | 62.7 $\pm$ 10.9               | 62.0 $\pm$ 10.1                 | 62.4 $\pm$ 10.4  |
| Median (range)          | 63 (23–84)                    | 63 (42–86)                      | 63 (23–86)       |
| Sex                     |                               |                                 |                  |
| Male                    | 47 (60)                       | 49 (61)                         | 96 (60)          |
| Female                  | 32 (40)                       | 32 (39)                         | 64 (40)          |
| Ethnicity               |                               |                                 |                  |
| Caucasian               | 59 (75)                       | 68 (84)                         | 127 (79)         |
| African American        | 8 (10)                        | 2 (2)                           | 10 (6)           |
| Hispanic                | 4 (5)                         | 7 (9)                           | 11 (7)           |
| Asian                   | 2 (2)                         | 3 (4)                           | 5 (3)            |
| Other                   | 6 (8)                         | 1 (1)                           | 7 (4)            |
| Disease Stage           |                               |                                 |                  |
| IV                      | 79 (100)                      | 81 (100)                        | 160 (100)        |
| No. of Lesions          |                               |                                 |                  |
| $\leq$ 4                | 41 (52)                       | 42 (52)                         | 83 (52)          |
| $>$ 4                   | 38 (48)                       | 39 (48)                         | 77 (48)          |
| Site of Bony Mets       |                               |                                 |                  |
| Abdomen                 | 4 (5)                         | 3 (4)                           | 7 (4)            |
| Thorax                  | 9 (11)                        | 10 (12)                         | 19 (12)          |
| Extremities             | 13 (17)                       | 15 (18)                         | 28 (17)          |
| Head/Neck               | 2 (2)                         | 4 (5)                           | 6 (4)            |
| Pelvis                  | 48 (61)                       | 46 (57)                         | 94 (59)          |
| Spine                   | 3 (4)                         | 3 (4)                           | 6 (4)            |
| No. of Sites Irradiated |                               |                                 |                  |
| 1                       | 64 (81)                       | 61 (75)                         | 125 (78)         |
| $>$ 1                   | 15 (19)                       | 20 (25)                         | 35 (22)          |
| Pain Score at Baseline  |                               |                                 |                  |
| 0-1                     | 1 (1)                         | 3 (4)                           | 4 (2)            |
| 2-4                     | 14 (18)                       | 22 (27)                         | 36 (23)          |
| 5-6                     | 14 (18)                       | 20 (25)                         | 34 (21)          |
| 7-10                    | 49 (63)                       | 36 (44)                         | 85 (54)          |
| Missing                 | 1                             | 0                               | 1                |
| Karnofsky Score         |                               |                                 |                  |
| 50-60                   | 10 (13)                       | 9 (11)                          | 19 (12)          |
| 70-80                   | 58 (73)                       | 57 (70)                         | 115 (72)         |
| 90-100                  | 11 (14)                       | 15 (19)                         | 26 (16)          |

| <b>eTable, continued</b>       |                     |                       |          |
|--------------------------------|---------------------|-----------------------|----------|
| Value or No. of Patients (%)   |                     |                       |          |
|                                | Multifraction Group | Single-Fraction Group | Total    |
|                                | (n=79)              | (n=81)                | (n=160)  |
| <b>Primary Cancer Site*</b>    |                     |                       |          |
| Adrenal-cortical               | 1 (1)               | 0 (0)                 | 1 (1)    |
| Bladder                        | 4 (5)               | 3 (4)                 | 7 (4)    |
| Breast                         | 3 (4)               | 11 (14)               | 14 (9)   |
| Esophagus                      | 4 (5)               | 4 (5)                 | 8 (5)    |
| Head and Neck                  | 1 (1)               | 2 (3)                 | 3 (2)    |
| Liver                          | 0 (0)               | 3 (4)                 | 3 (2)    |
| Lung                           | 47 (60)             | 32 (39)               | 79 (49)  |
| Pancreas                       | 0 (0)               | 1 (1)                 | 1 (1)    |
| Prostate                       | 9 (11)              | 14 (17)               | 23 (14)  |
| Renal Cell                     | 5 (6)               | 9 (11)                | 14 (9)   |
| Thymoma                        | 1 (1)               | 0 (0)                 | 1 (1)    |
| Thyroid                        | 2 (2)               | 0 (0)                 | 2 (1)    |
| Unknown/Lung                   | 0 (0)               | 1 (1)                 | 1 (1)    |
| Uveal Melanoma                 | 1 (1)               | 0 (0)                 | 1 (1)    |
| Multiple Myeloma               | 1 (1)               | 1 (1)                 | 2 (1)    |
| <b>Primary Tumor Histology</b> |                     |                       |          |
| Adenocarcinoma                 | 50 (64)             | 51 (61)               | 101 (63) |
| Adenoid Cystic                 | 1 (1)               | 0 (0)                 | 1 (1)    |
| Adrenal Cortical Carcinoma     | 1 (1)               | 0 (0)                 | 1 (1)    |
| Atypical Carcinoid             | 1 (1)               | 0 (0)                 | 1 (1)    |
| Carcinoma                      | 1 (1)               | 1 (1)                 | 2 (1)    |
| Clear Cell                     | 5 (6)               | 9 (11)                | 14 (9)   |
| Ductal Carcinoma               | 0 (0)               | 4 (5)                 | 4 (2)    |
| Lobular Carcinoma              | 1 (1)               | 1 (1)                 | 2 (1)    |
| Melanoma                       | 1 (1)               | 0 (0)                 | 1 (1)    |
| Neuroendocrine                 | 1 (1)               | 3 (4)                 | 4 (2)    |
| Papillary                      | 2 (3)               | 0 (0)                 | 2 (1)    |
| Pleiomorphic Carcinoma         | 1 (1)               | 0 (0)                 | 1 (1)    |
| Poorly Diff Carcinoma          | 1 (1)               | 0 (0)                 | 1 (1)    |
| Sarcomatoid                    | 1 (1)               | 0 (0)                 | 1 (1)    |
| Small Cell                     | 1 (1)               | 3 (4)                 | 4 (2)    |
| Squamous                       | 6 (8)               | 5 (6)                 | 11 (7)   |
| Urothelial Carcinoma           | 3 (4)               | 4 (5)                 | 7 (4)    |
| Other                          | 1 (1)               | 2 (2)                 | 3 (2)    |

\*Percentages may not total 100 because of rounding.  
Abbreviations: SD, standard deviation.

**eFigure 1.** Overall survival estimates by treatment group in the intent-to-treat analysis.

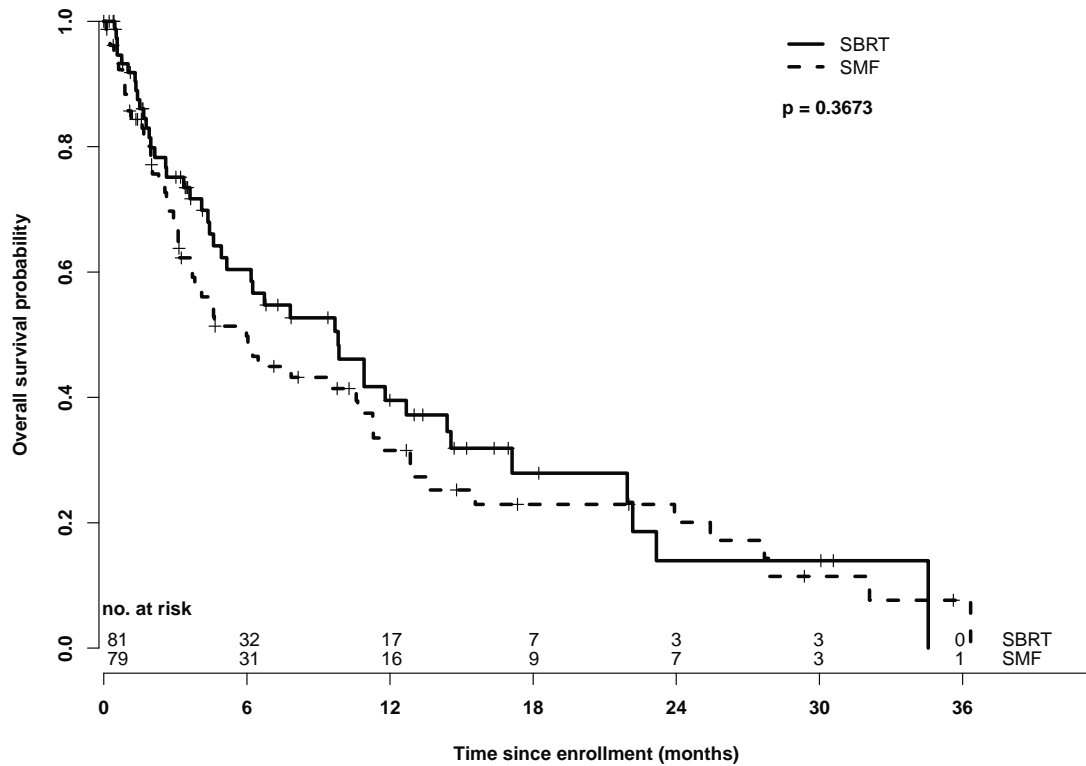

SBRT, single-fraction stereotactic body radiation therapy (to 12 or 16 Gy); MFRT, standard multifraction radiation (to 30 Gy in ten 3-Gy fractions). Overall survival did not differ between the treatment groups ( $P=0.3673$ ).

**eFigure 2.** Proportions of patients with or without severe symptoms on the 13-core-item MD Anderson Symptom Index (MDASI) after irradiation of bone metastases.

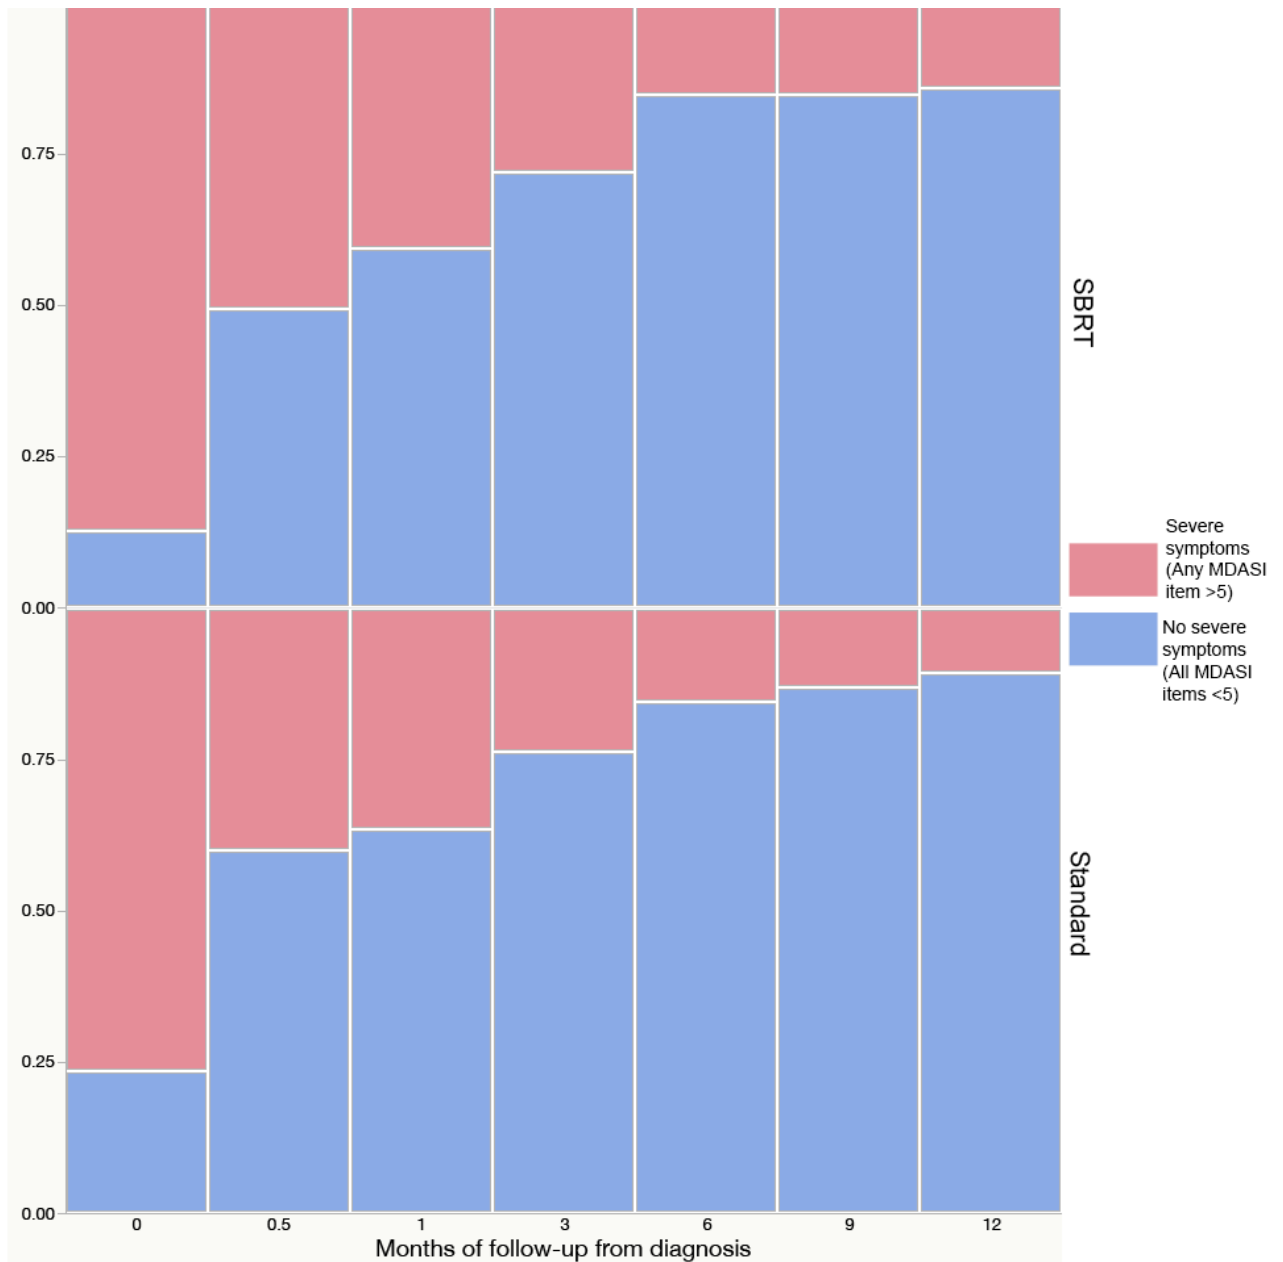

The severity of symptoms lessened over time during the first year after treatment in both treatment groups (i.e., those receiving either single-fraction stereotactic radiation therapy to 12 or 16 Gy [SABR] or standard multifraction radiation therapy to 30 Gy in 10 fractions), but no differences were found between groups. Red indicates severe symptoms, defined as having a score of >5 on any MDASI item; blue indicates no severe symptoms, defined as having scores of <5 on all MDASI items.
